# Supplementary material for: Controlled synthesis of pH responsive cationic polymers containing side-chain peptide moieties viaRAFT polymerization and their self-assembly
Source: Royal Society of Chemistry journal article supplement (doi:10.1039/c2tb00170e), 2012-11-20
Supplement: c2tb00170e.pdf [file c2tb00170e.pdf]

## Supporting Information for

# Controlled Synthesis of pH Responsive Cationic Polymers Containing Side-Chain Peptide Moieties *via* RAFT Polymerization and Their Self Assembly

Sonu Kumar,<sup>a</sup> Rituparna Acharya,<sup>b</sup> Urmi Chatterji,<sup>b</sup> and Priyadarsi De<sup>\*,a</sup>

<sup>a</sup> Polymer Research Centre, Department of Chemical Sciences, Indian Institute of Science Education and Research – Kolkata, PO: BCKV Campus Main Office, Mohanpur - 741252, Nadia, West Bengal, India

<sup>b</sup> Department of Zoology, University of Calcutta, 35 Ballygunge Circular Road, Kolkata - 700019, West Bengal, India

\* Corresponding author: Fax: +91-33-25873020, E-mail: [p\\_de@iiserkol.ac.in](mailto:p_de@iiserkol.ac.in) (P. De).

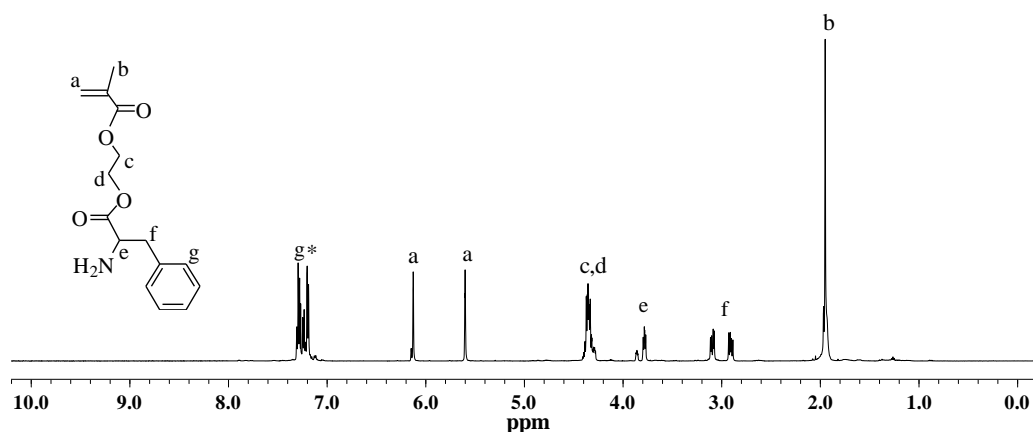

**Fig. S1** The <sup>1</sup>H NMR spectrum of H<sub>2</sub>N-Phe-EMA (\* denotes the resonances of CDCl<sub>3</sub>).

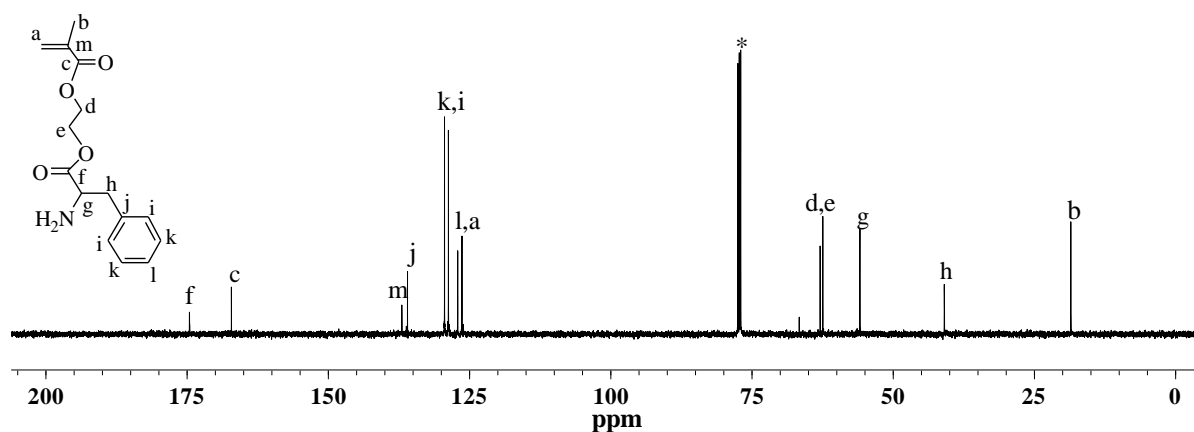

**Fig. S2** The <sup>13</sup>C NMR spectrum of H<sub>2</sub>N-Phe-EMA (\* denotes the resonances of CDCl<sub>3</sub>).

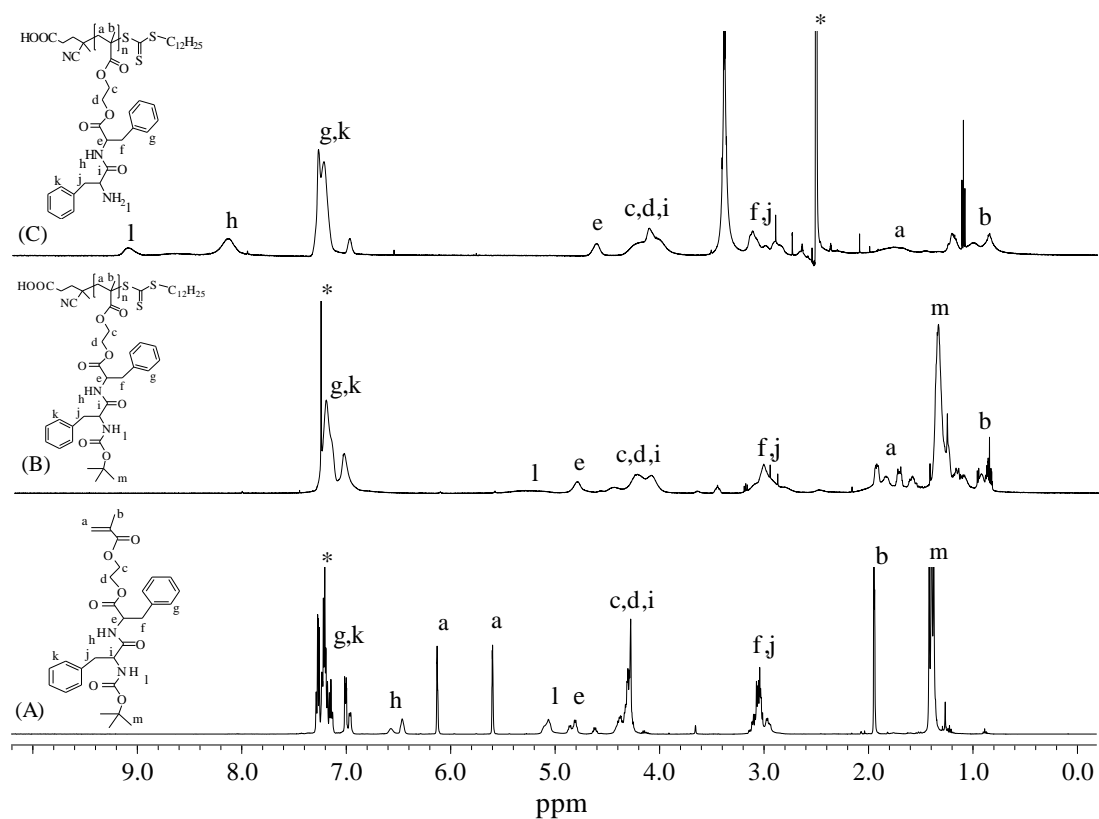

**Fig. S3** The  $^1\text{H}$  NMR spectra of (A) Boc-FF-EMA monomer, (B) P(Boc-FF-EMA) homopolymer in  $\text{CDCl}_3$ , and (C) P(FF-EMA) in  $\text{DMSO}-d_6$  (\* denotes the solvent resonances).

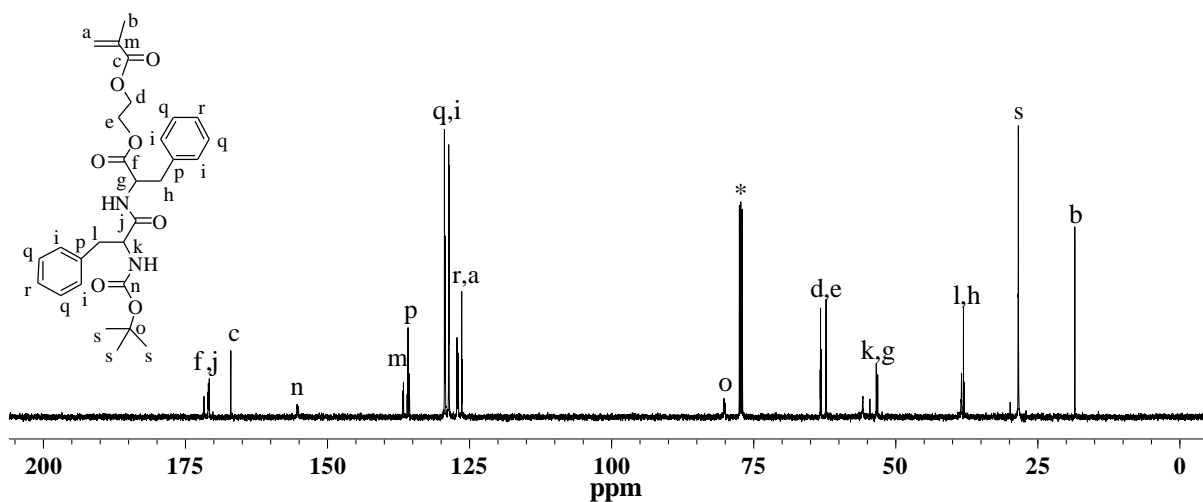

**Fig. S4** The  $^{13}\text{C}$  NMR spectrum of Boc-FF-EMA (\* denotes the resonances of  $\text{CDCl}_3$ ).

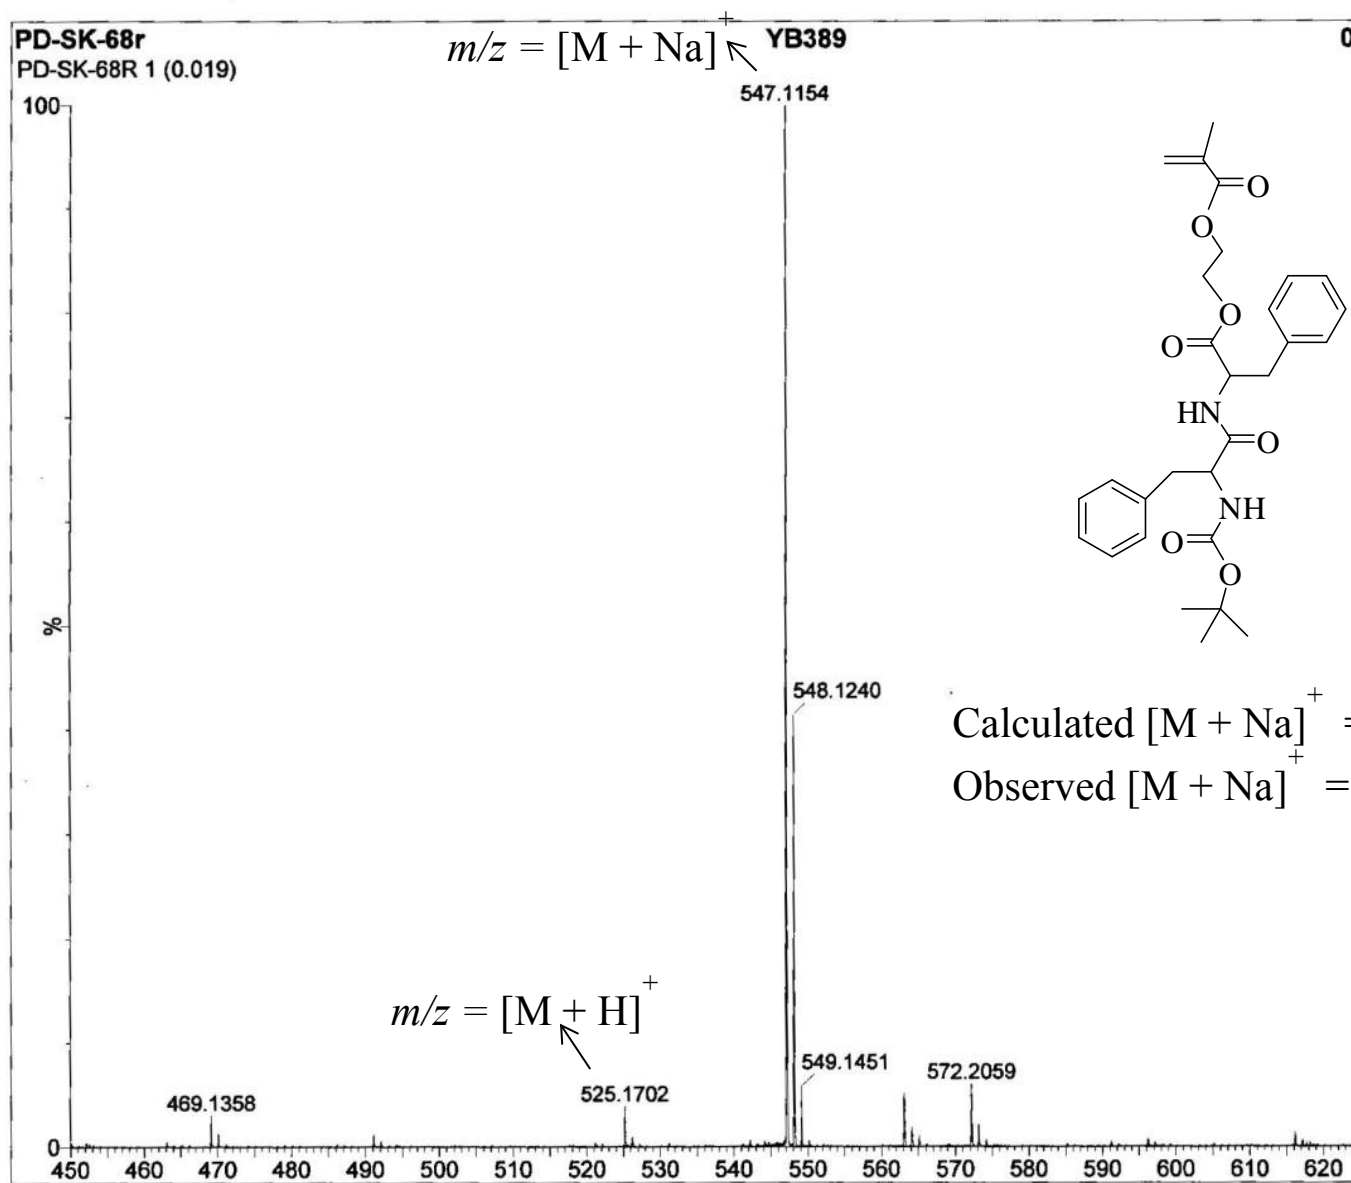

Fig. S5 The ESI-MS spectrum of Boc-FF-EMA.

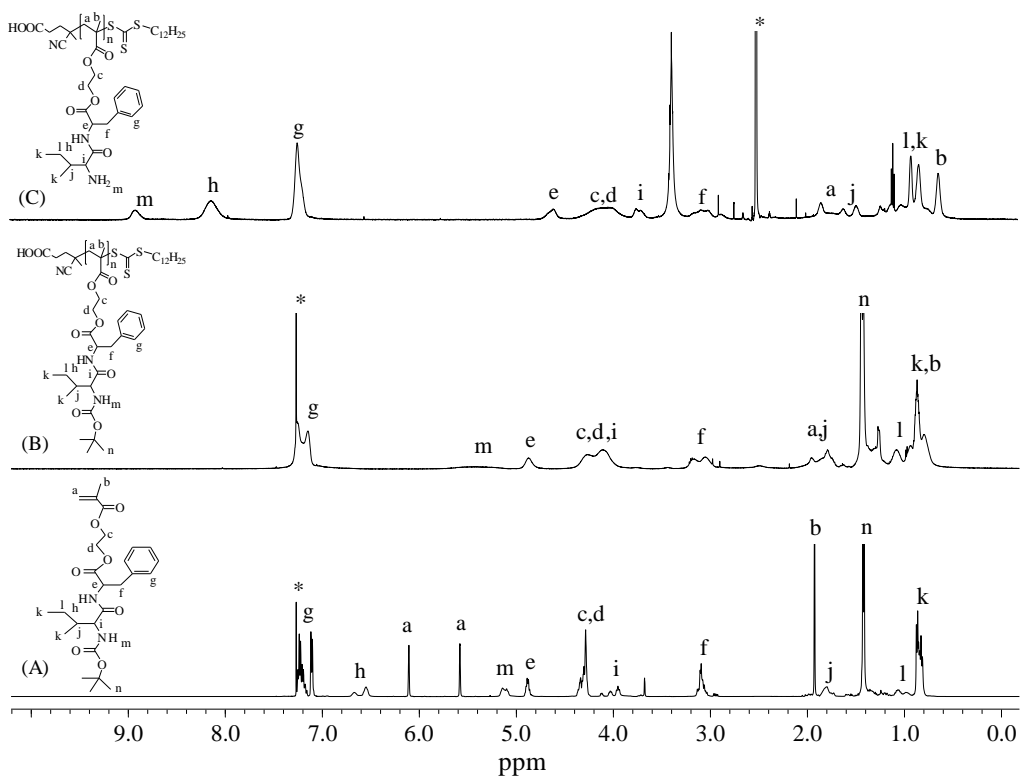

**Fig. S6** The  $^1\text{H}$  NMR spectra of (A) Boc-IF-EMA monomer, (B) P(Boc-IF-EMA) homopolymer in  $\text{CDCl}_3$ , and (C) P(IF-EMA) in  $\text{DMSO}-d_6$  (\* denotes the solvent resonances).

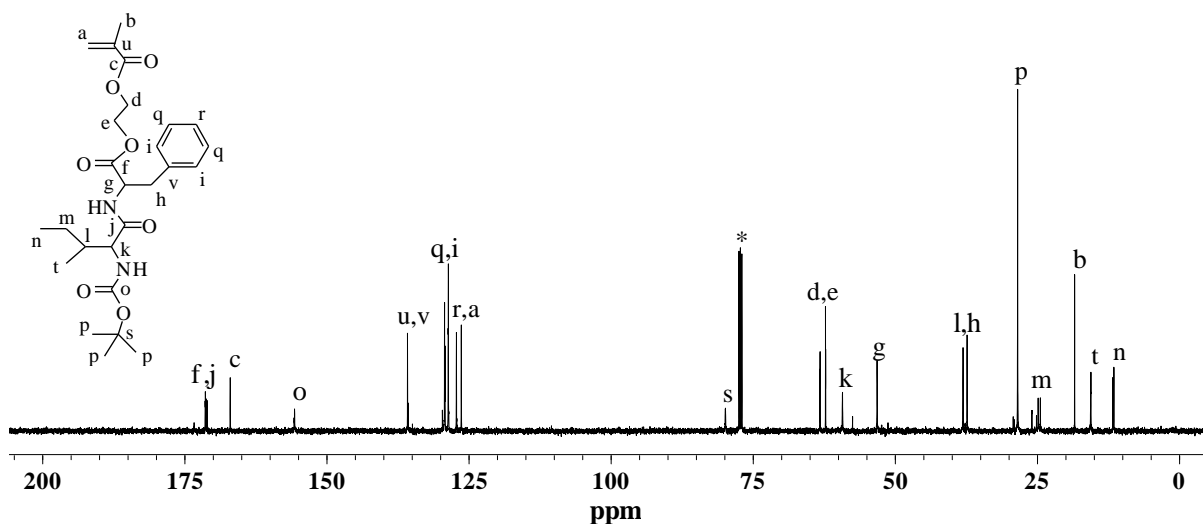

**Fig. S7** The  $^{13}\text{C}$  NMR spectrum of monomer Boc-IF-EMA (\* denotes the resonances of  $\text{CDCl}_3$ ).

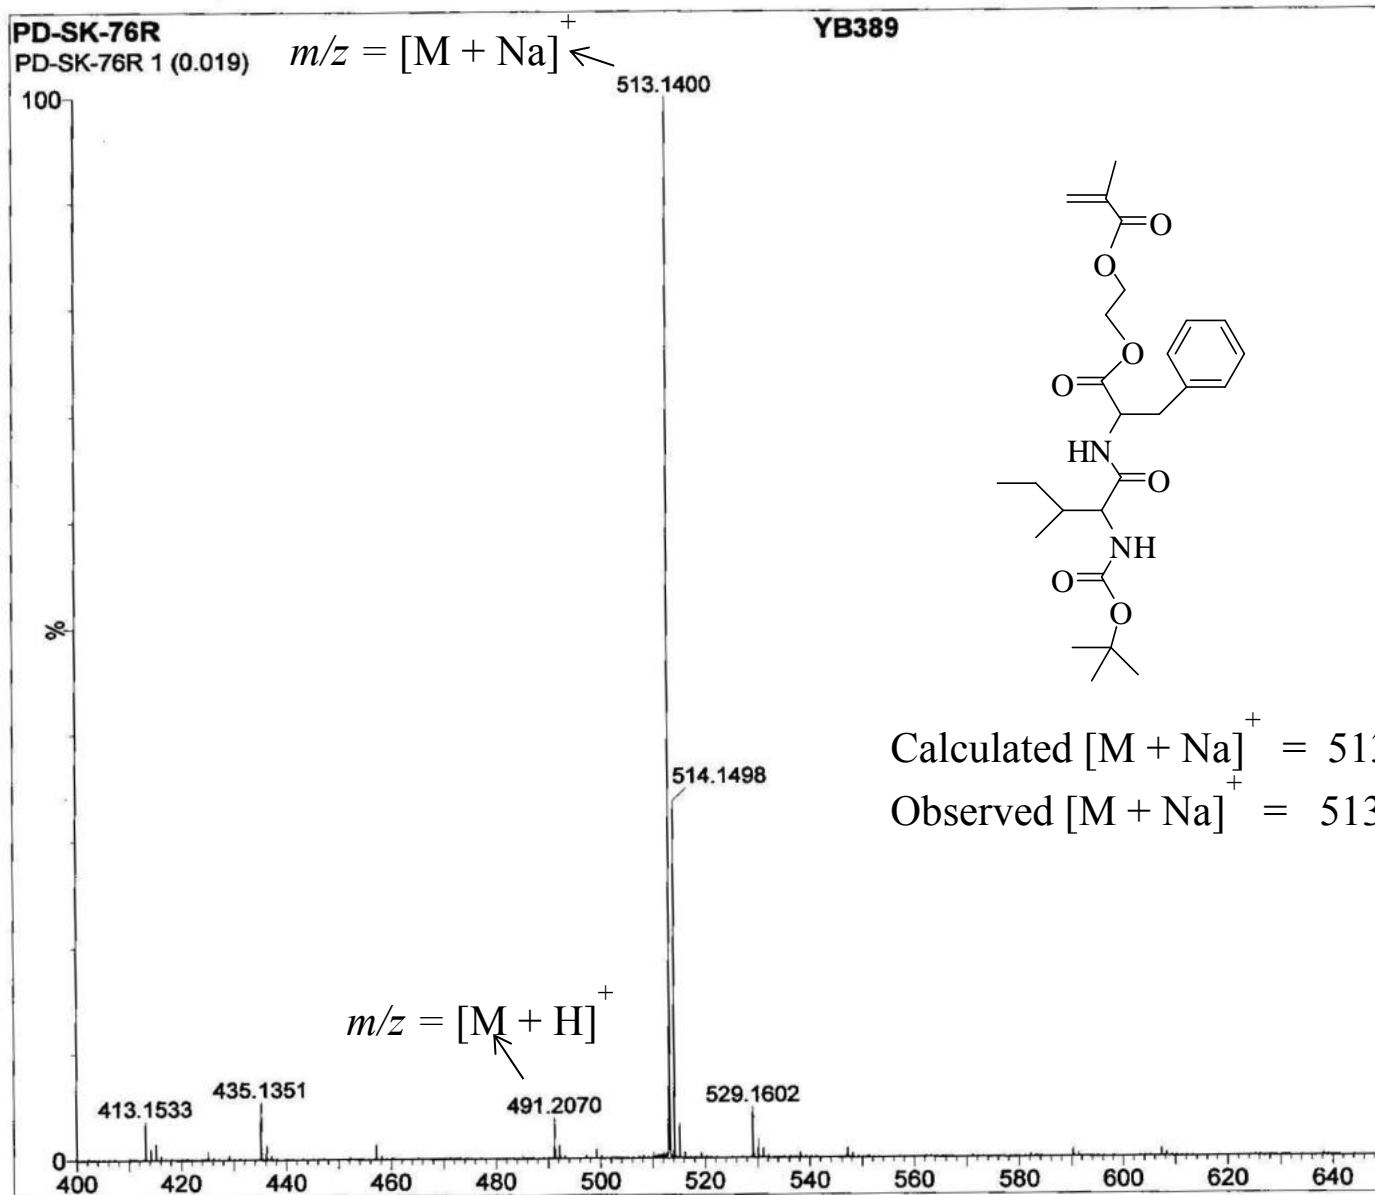

Fig. S8 The ESI-MS spectrum of Boc-IF-EMA.

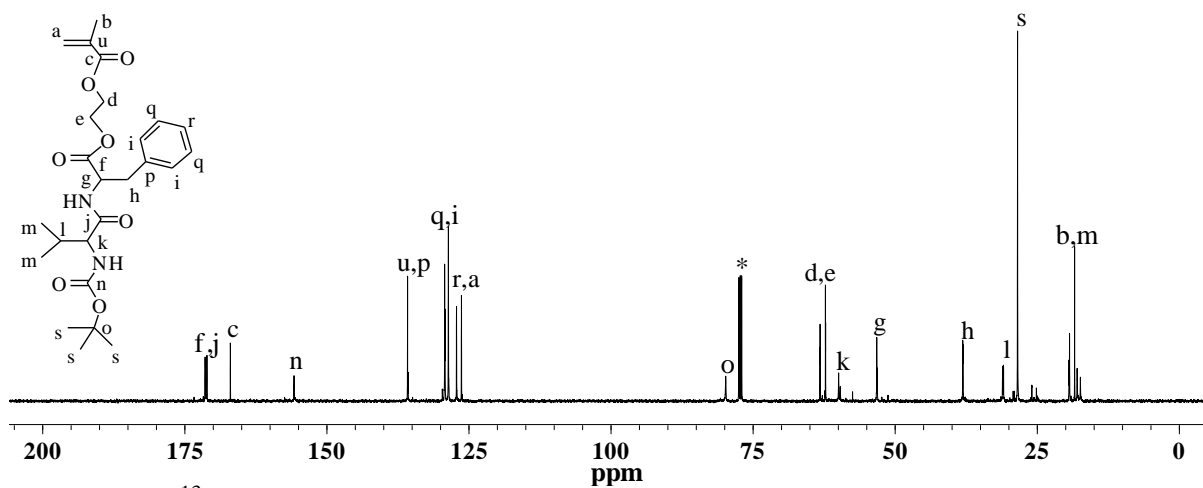

**Fig. S9** The <sup>13</sup>C NMR spectrum of monomer Boc-VF-EMA (\* denotes the resonances of CDCl<sub>3</sub>).





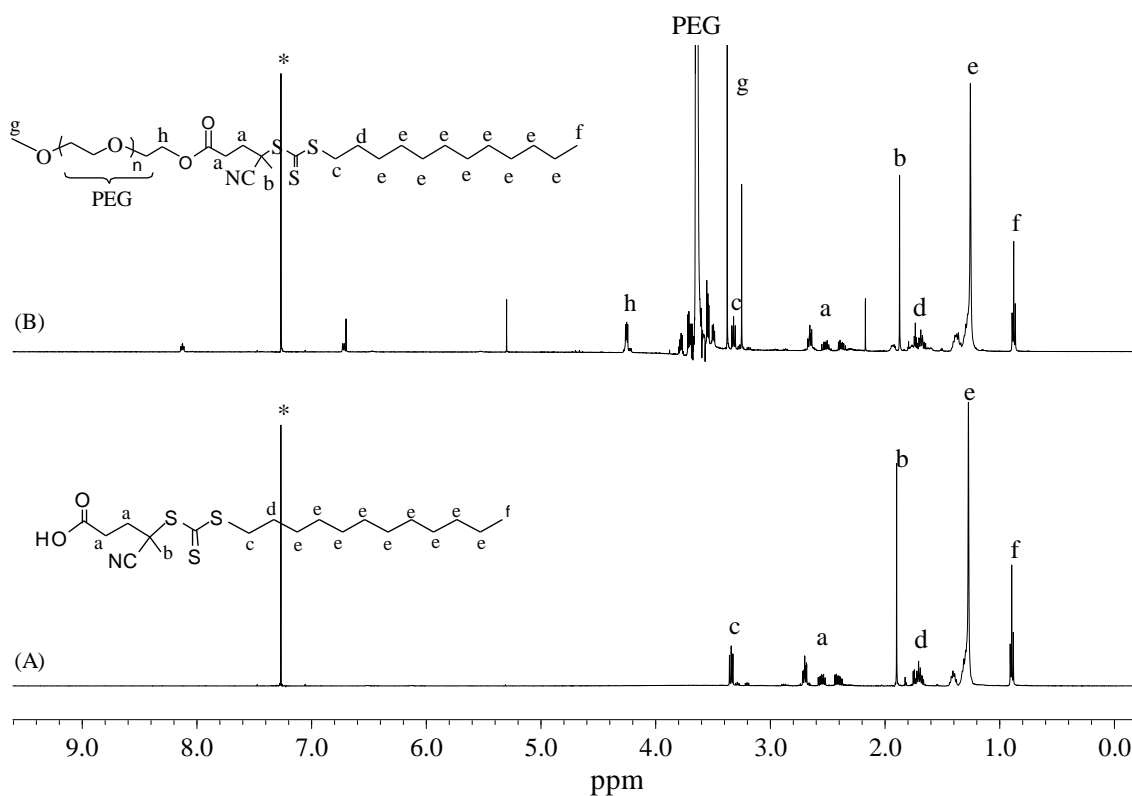

**Fig. S11** The <sup>1</sup>H NMR spectra of chain transfer agent (A) CDP, and (B) mPEG-CDP macro-CTA (\* denotes the resonances of CDCl<sub>3</sub>).

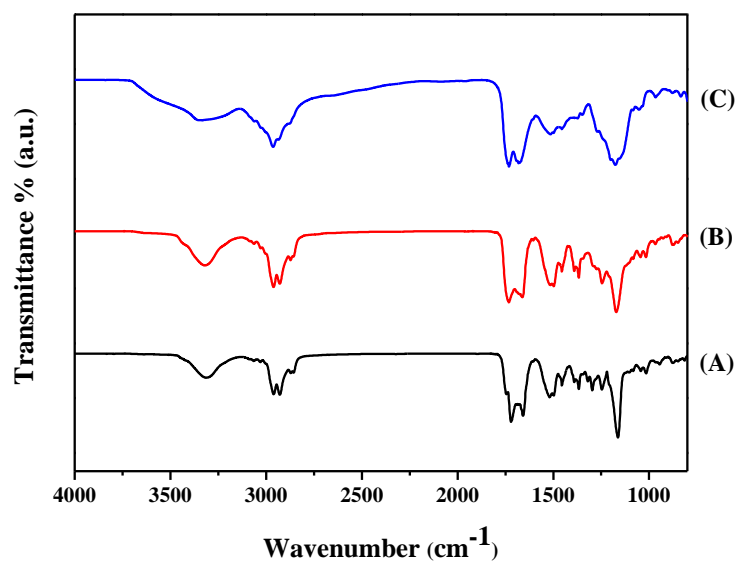

**Fig. S12** FT-IR spectra of (A) Boc-VF-EMA, (B) P(Boc-VF-EMA), and (C) P(VF-EMA).

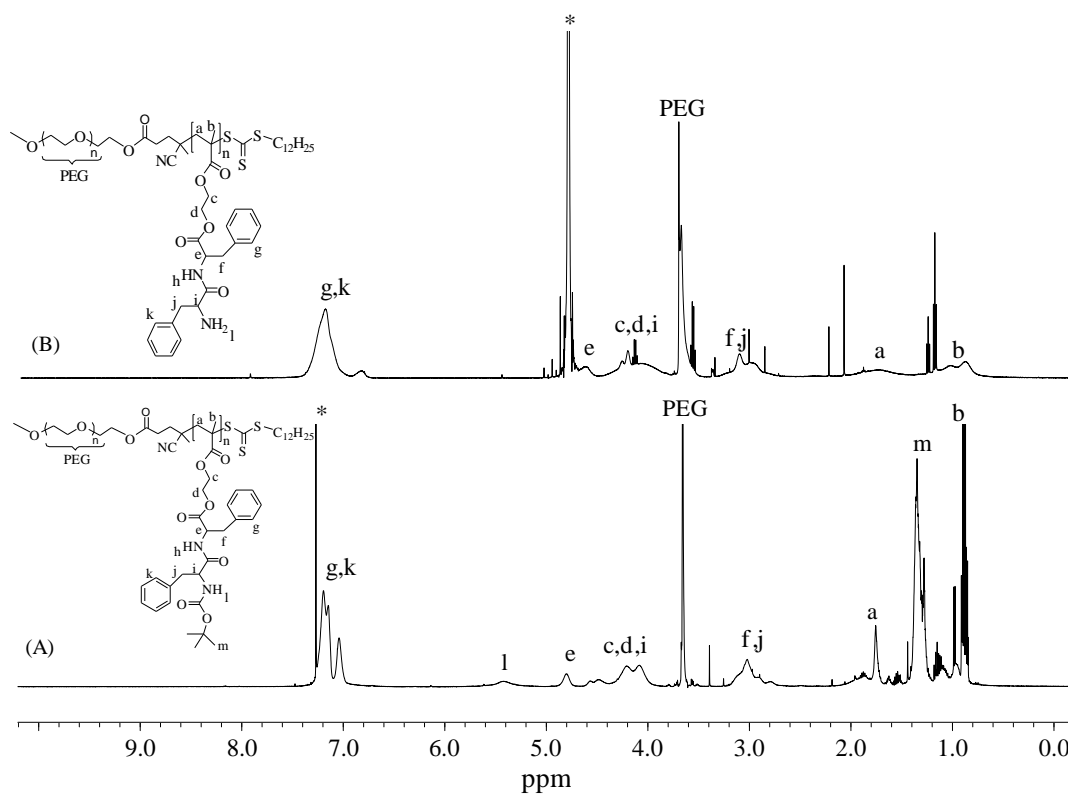

**Fig. S13** The <sup>1</sup>H NMR spectra of (A) mPEG-*b*-P(Boc-FF-EMA) block copolymer in CDCl<sub>3</sub> and (B) mPEG-*b*-P(FF-EMA) in D<sub>2</sub>O (\* denotes the solvent resonances).

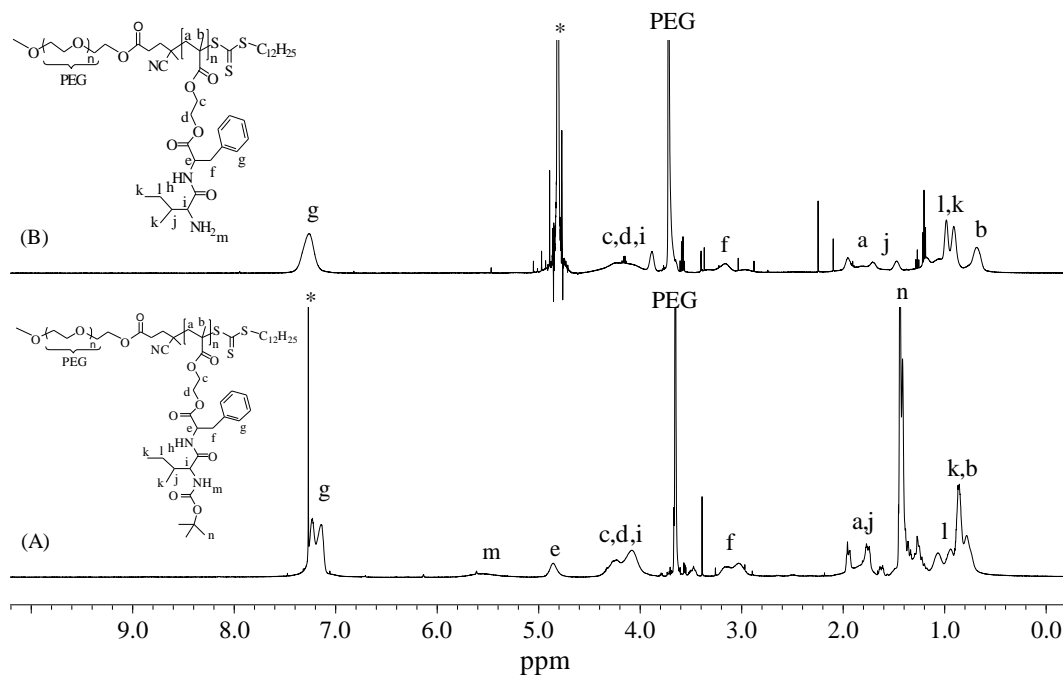

**Fig. S14** <sup>1</sup>H NMR spectra of block copolymers (A) mPEG-*b*-P(Boc-IF-EMA) in CDCl<sub>3</sub> (B) mPEG-*b*-P(IF-EMA) in D<sub>2</sub>O (\* denotes the solvent resonances).

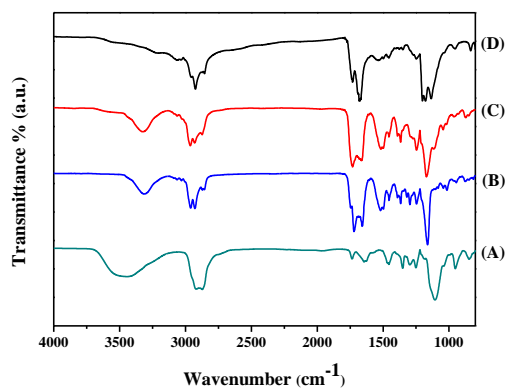

**Fig. S15** FT-IR spectra of (A) mPEG-CDP, (B) Boc-VF-EMA, (C) mPEG-*b*-P(Boc-VF-EMA) and (D) mPEG-*b*-P(VF-EMA).

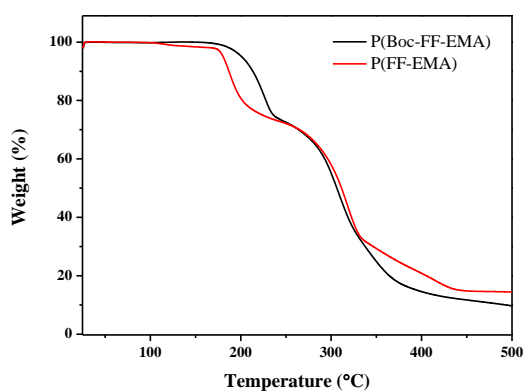

**Fig. S16** TGA curves of dipeptide based homopolymers.

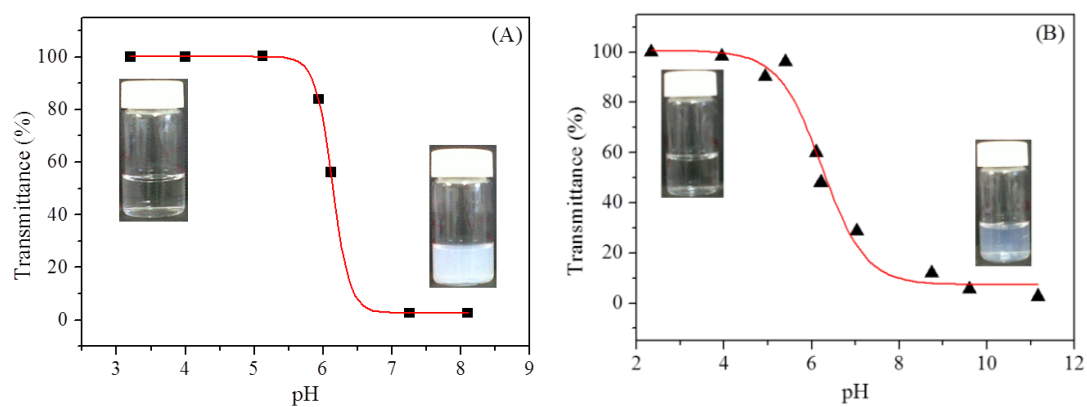

**Fig. S17** Effect of pH on the absorbance at 550 nm of (A) P(IF-EMA) homopolymer, and (B) block copolymer mPEG-*b*-P(IF-EMA).

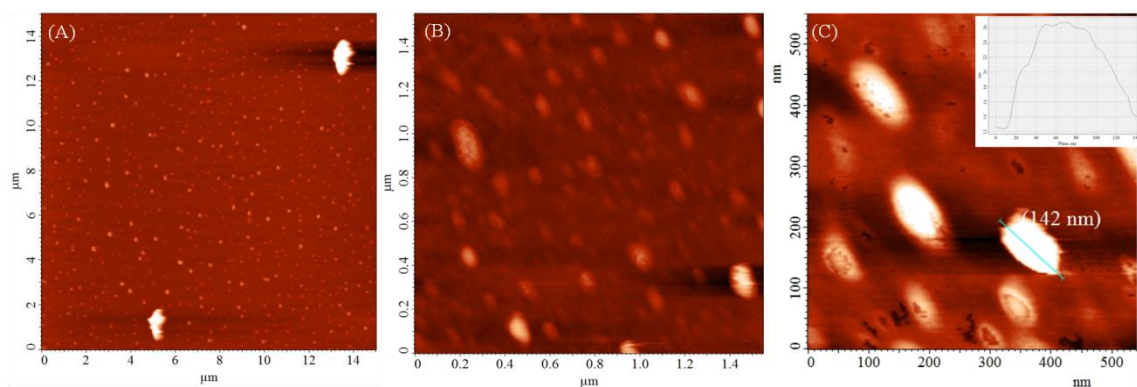

**Fig. S18** AFM height images of mPEG-*b*-P(Boc-FF-EMA) block copolymer in different magnification (prepared from 0.1 mg mL<sup>-1</sup> aqueous solution). Inset in C: height profile plot (line marked in C).

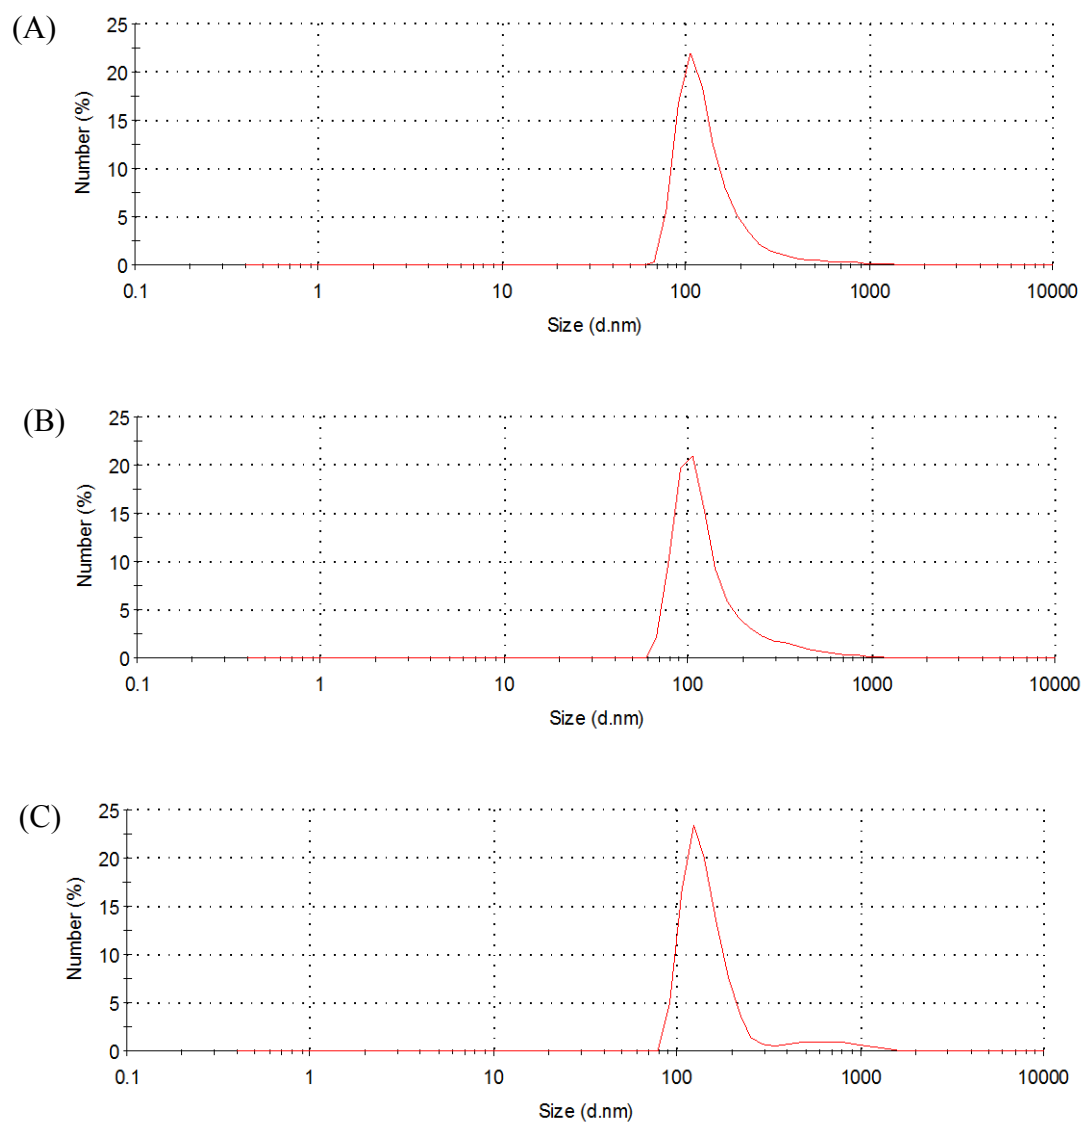

**Fig. S19** DLS study of (A) mPEG-*b*-P(Boc-FF-EMA), (B) mPEG-*b*-P(Boc-IF-EMA), and (C) mPEG-*b*-P(Boc-VF-EMA), at a concentration 1 mg mL<sup>-1</sup>.

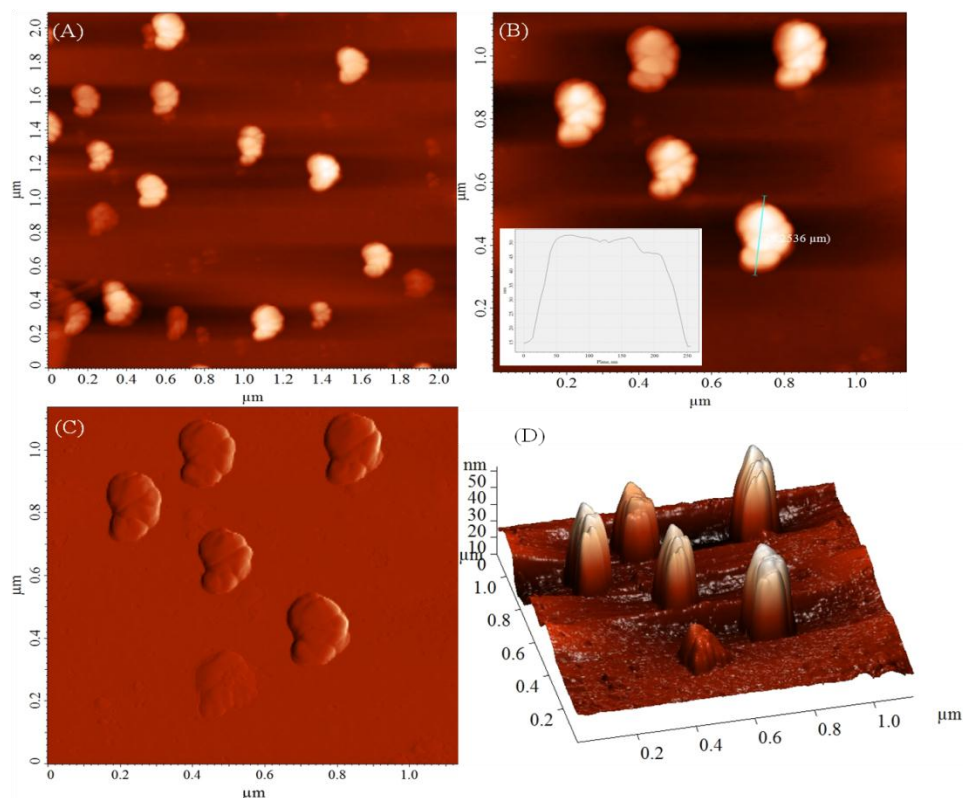

**Fig. S20** AFM height (A and B), magnitude (C) and 3D (D) images of mPEG-*b*-P(Boc-IF-EMA) block copolymer (prepared from 0.1 mg mL<sup>-1</sup> aqueous solution). Inset in B: height profile plot (line marked in B).

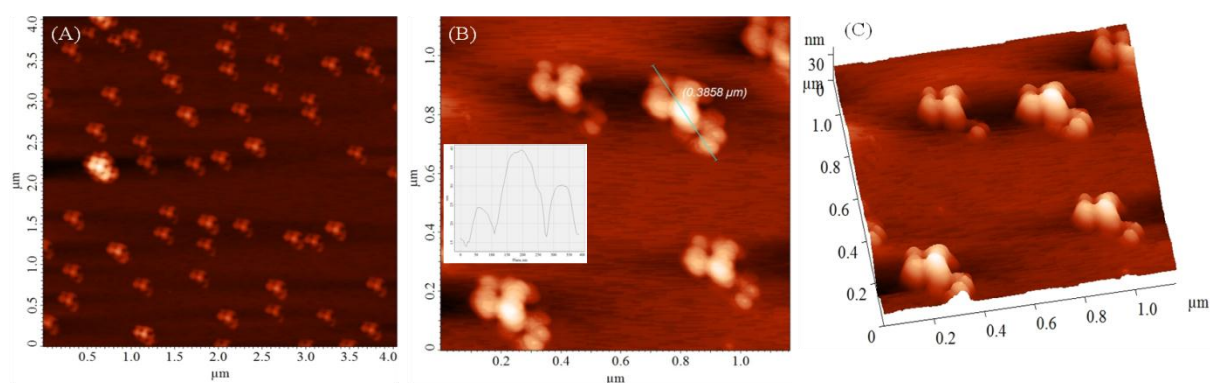

**Fig. S21** AFM height (A and B), and 3D (C) images of mPEG-*b*-P(Boc-VF-EMA) block copolymer (prepared from 0.1 mg mL<sup>-1</sup> aqueous solution). Inset in B: height profile plot (line marked in B).

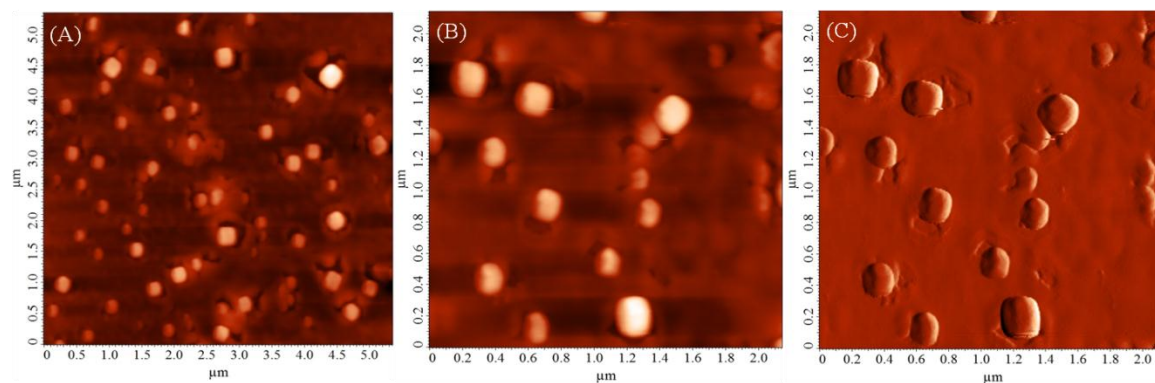

**Fig. S22** AFM height (A and B), and magnitude (C) images of block copolymer mPEG-*b*-P(FF-EMA) (prepared from 0.1 mg mL<sup>-1</sup> aqueous solution).

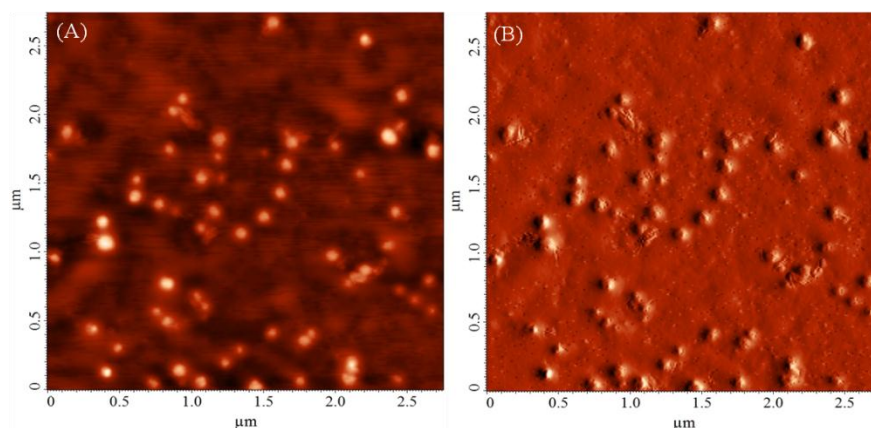

**Fig. S23** AFM height (A), and magnitude (B) images of block copolymer mPEG-*b*-P(IF-EMA) (prepared from 0.1 mg mL<sup>-1</sup> aqueous solution).

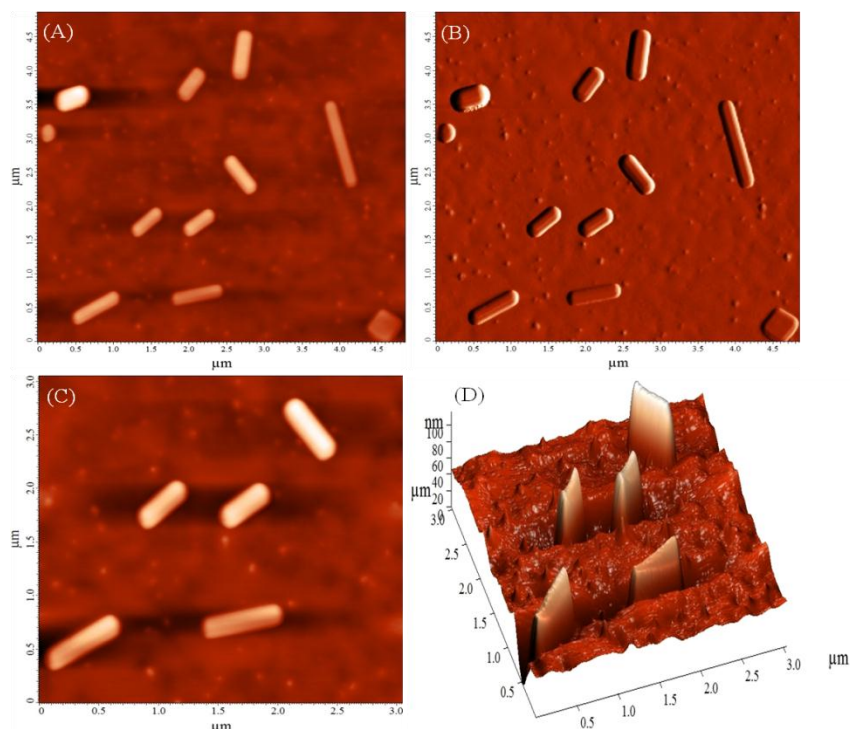

**Fig. S24** AFM image of double hydrophilic block copolymer mPEG-*b*-P(VF-EMA) in aqueous solution, (A and C) height image, (B) magnitude image, and (D) 3D image (0.1 mg mL<sup>-1</sup>).



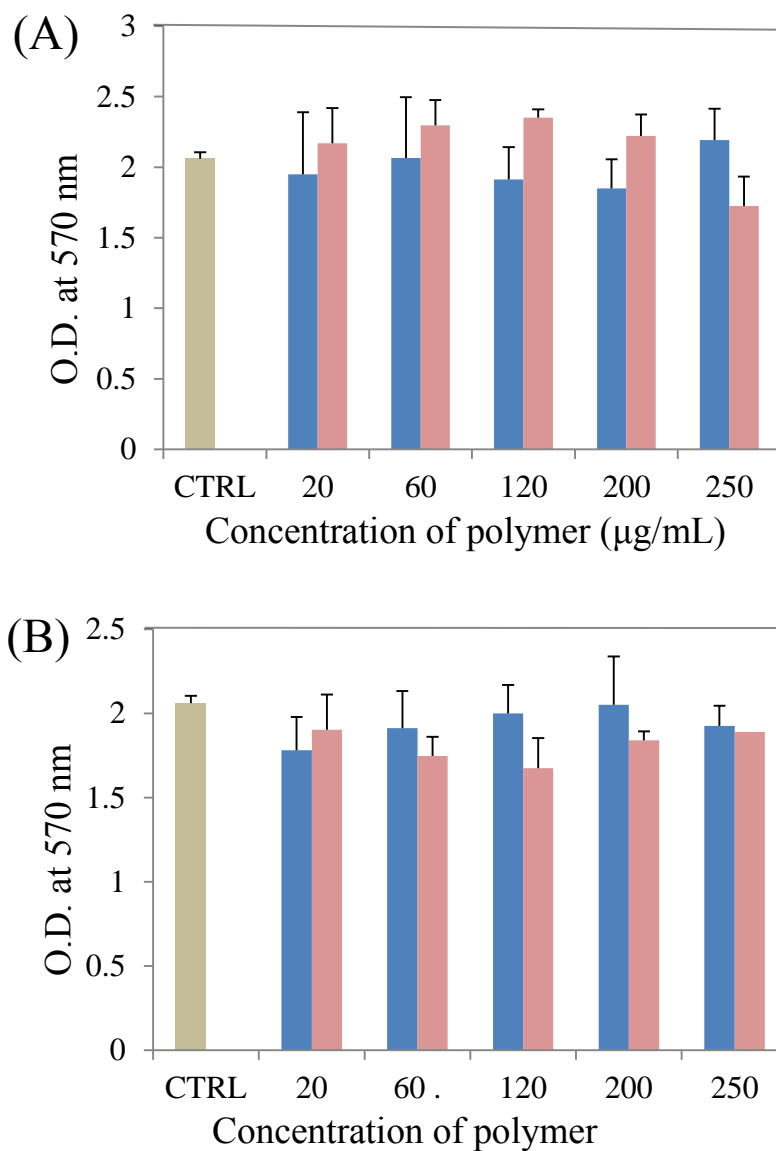

**Fig. S25** Cytotoxicity of various polymers on HeLa cells: (A) P(IF-EMA) (blue color) and P(VF-EMA) (pink color), and (B) mPEG-*b*-P(IF-EMA) (blue color) and mPEG-*b*-P(VF-EMA) (pink color).

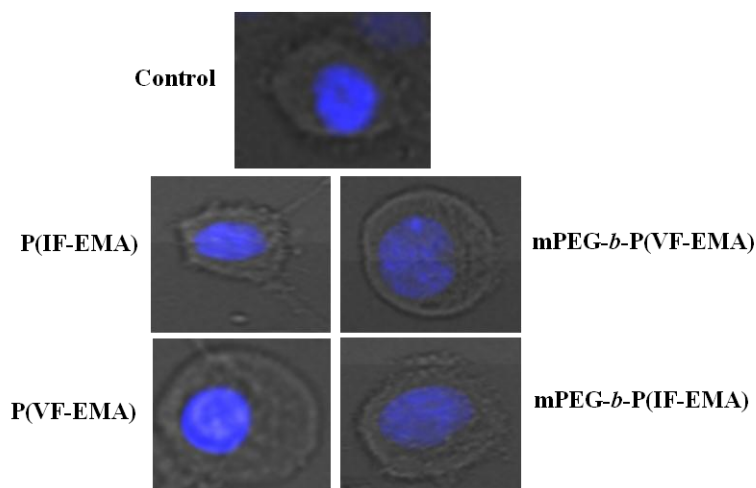

**Fig. S26** Fluorescence microscopic merged images of a single ME-180 cells taken at 72 h post-incubation of control and polymer treatment with 60  $\mu\text{g}/\text{mL}$  concentrations.

**Spectroscopic Analysis of  $\omega$ -Trithiocarbonate Moiety.** For the homopolymers, the percentage of living chain ends was calculated using UV-Vis spectroscopy. The molar absorptivity value ( $\epsilon$ ) was calculated as  $12326 \text{ M}^{-1} \text{ cm}^{-1}$  for CDP in DMF at  $27^\circ\text{C}$  (S. Kumar, S. G. Roy and P. De, *Polym. Chem.*, 2012, **3**, 1239-1248.), and used in this study. We have prepared two different stock solutions of P(Boc-dipep-EMA) homopolymers and absorptions values at 309 nm were determined by UV-Vis spectroscopic analysis. Then, number-average molecular weight ( $M_{n,\text{UV-vis}}$ ) was determined for both the concentrations and the average value was determined.
